# Supplementary material for: Combining Cu-SSZ-13 with TiO2: promotion of urea decomposition and influence on SCR
Source: Royal Society of Chemistry journal article supplement (doi:10.1039/d2re00140c), 2022-01-01
Supplement: d2re00140c1.pdf [file d2re00140c1.pdf]

## Supplementary Information

### Combining Cu-SSZ-13 with TiO<sub>2</sub>: Promotion on urea decomposition and influence on SCR

Yue Ma<sup>a</sup>, Zhimin Shao<sup>c</sup>, Xiaodong Wu<sup>a,\*</sup>, Yang Gao<sup>a</sup>, Baofang Jin,<sup>d</sup> Rui Ran<sup>a</sup>,  
Zhichun Si<sup>b</sup>, Zhenguo Li<sup>e</sup>, Duan Weng<sup>a,b,\*</sup>

<sup>a</sup> The Key Laboratory of Advanced Materials of Ministry of Education, School of Materials Science and Engineering, Tsinghua University, Beijing 100084, China

<sup>b</sup> Graduate School at Shenzhen, Tsinghua University, Shenzhen 518055, China

<sup>c</sup> Department of Electronic Engineering, Tsinghua University, Beijing 100084, China

<sup>d</sup> State Key Laboratory of Multiphase Complex Systems, Institute of Process Engineering, Chinese Academy of Sciences, Beijing, 100190, China

<sup>e</sup> National Engineering Laboratory for Mobile Source Emission Control Technology, China Automotive Technology & Research Center Co., Ltd., Tianjin 300300, China

The TG curves of the catalysts loaded with urea are shown in Fig. S1 and the weight loss stages are divided according to Figs. 1 and 2. Though the urea loading and water content were slightly different over these catalysts, the contribution of the first urea desorption stage (urea thermolysis) to the overall decomposition weight loss was roughly estimated in Table S1. Ti modification increases the proportion of decomposed urea in the first stage. As a result, the amount of residual urea that transforms to polymerized by-products (*e.g.*, biuret and CyA) at higher temperatures is reduced. The abnormal decreased “F” value over 10Ti-Cu-SSZ-13 is plausibly attributed to decreased Ti dispersion at this high Ti loading.

---

\* Corresponding author. Tel.: +86 10 62792375

E-mail address: wuxiaodong@tsinghua.edu.cn (X. Wu), duanweng@tsinghua.edu.cn (D. Weng)

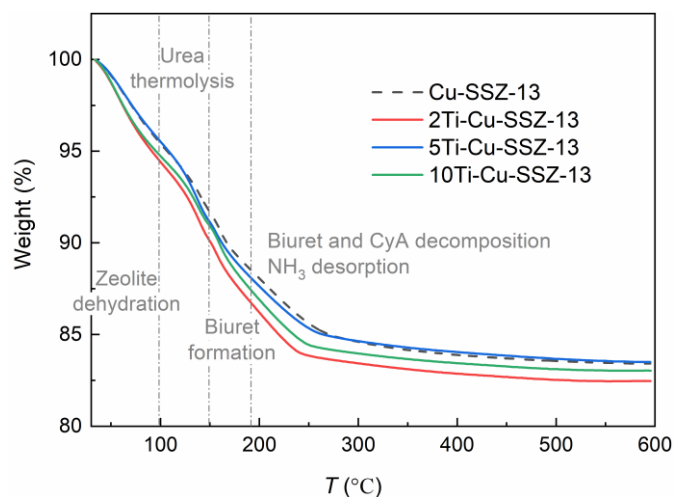

Fig. S1. TG curves of the catalysts loaded with urea.

Table S1. Calculation of the contribution of urea thermolysis in overall decomposition process.

| Catalyst       | A<br>Total<br>weight<br>loss<br>(%) | B<br>Weight loss<br>after<br>dehydration<br>(%) | C=A-B<br>Urea<br>loading<br>(%) | D<br>Weight loss<br>after urea<br>thermolysis<br>(%) | E=B-D<br>Weight loss<br>of urea<br>thermolysis<br>(%) | F=E/C<br>Proportion of urea<br>thermolysis in total<br>urea loading<br>(%) |
|----------------|-------------------------------------|-------------------------------------------------|---------------------------------|------------------------------------------------------|-------------------------------------------------------|----------------------------------------------------------------------------|
| Cu-SSZ-13      | 82.92                               | 95.16                                           | 12.48                           | 91.60                                                | 3.56                                                  | 28.5                                                                       |
| 2Ti-Cu-SSZ-13  | 82.46                               | 94.50                                           | 12.04                           | 90.08                                                | 4.42                                                  | 36.7                                                                       |
| 5Ti-Cu-SSZ-13  | 83.50                               | 95.64                                           | 12.14                           | 91.20                                                | 4.44                                                  | 36.6                                                                       |
| 10Ti-Cu-SSZ-13 | 83.04                               | 94.81                                           | 11.77                           | 91.01                                                | 3.80                                                  | 32.3                                                                       |

The N<sub>2</sub> selectivity of the catalysts in SCR tests were calculated according to Eq. S1 and summarized in Fig. S2. All the catalysts show N<sub>2</sub> selectivity close to 100% in the whole temperature range, with N<sub>2</sub>O outlet concentration lower than 10 ppm.

$$N_2 \text{ selectivity } (\%) = \left( 1 - \frac{[NO_2]_{out} + 2 \times [N_2O]_{out}}{[NO]_{in} + [NH_3]_{in} - [NO]_{out} - [NH_3]_{out}} \right) \times 100 \quad (\text{Eq. S1})$$

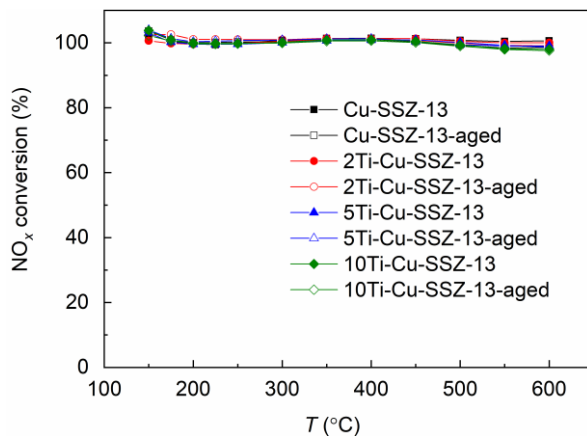

Fig. S2. N<sub>2</sub> selectivity of the catalysts in SCR tests.

Fig. S3 shows the XRD patterns of the catalysts in  $2\theta$  range  $5\text{-}40^\circ$  with a scanning rate of  $6^\circ/\text{min}$ , which exhibit typical CHA diffraction features. Characteristic peaks of  $\text{TiO}_2$  can hardly be identified from these fast-scanning curves, indicating high dispersion of  $\text{TiO}_2$  nanoparticles. Delicate analysis of  $\text{TiO}_2$  structure is provided in the main text (Fig. 6b). Aging does not lead to any remarkable changes on the crystalline structure of the catalysts, except for slightly decreased diffraction intensity due to dealumination.

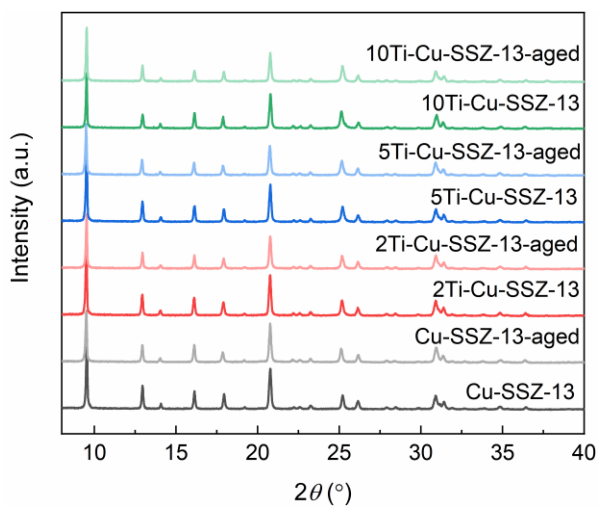

Fig. S3. XRD patterns of the catalysts.

N<sub>2</sub> physisorption experiments (at -196 °C) was conducted on a JW-BK122F physisorption analyzer (Jingweigaobo, China). The samples were degassed at 220 °C for 8 h under vacuum conditions. The specific surface area ( $S_{\text{BET}}$ ) was calculated by Brunauer-Emmett-Tellerand (BET) method, and micropore volume ( $V_{\text{micro}}$ ) was calculated by  $t$ -plot method.

As listed in Table S2, TiO<sub>2</sub> loading partially blocks the micropores of Cu-SSZ-13, resulting in somewhat decreased  $S_{\text{BET}}$  and  $V_{\text{micro}}$ , especially for 10Ti-Cu-SSZ-13. Hydrothermal aging also decreases the  $S_{\text{BET}}$  and  $V_{\text{micro}}$  of the catalysts, attributed to partial structural damage. However, such extent of changes in textural properties should not lead to any remarkable differences in SCR and NH<sub>3</sub> oxidation activities (Figs. 3 and 7a).

Table S2. Textural properties of the catalysts.

| Catalyst           | $S_{\text{BET}}$<br>(m <sup>2</sup> /g) | $V_{\text{micro}}$<br>(cm <sup>3</sup> /g) |
|--------------------|-----------------------------------------|--------------------------------------------|
| Cu-SSZ-13          | 762                                     | 0.289                                      |
| 2Ti-Cu-SSZ-13      | 707                                     | 0.266                                      |
| 5Ti-Cu-SSZ-13      | 722                                     | 0.272                                      |
| 10Ti-Cu-SSZ-13     | 634                                     | 0.237                                      |
| Cu-SSZ-13-aged     | 746                                     | 0.266                                      |
| 5Ti-Cu-SSZ-13-aged | 711                                     | 0.286                                      |

$\text{NH}_3$  temperature-programmed desorption ( $\text{NH}_3$ -TPD) was performed on a fixed bed reactor with a Nicolet 380 (ThermoFisher, USA) FTIR gas analyzer. 50 mg catalyst was loaded and pretreated in 21%  $\text{O}_2/\text{N}_2$  at 600 °C for 20 min. After being saturated in 500 ppm  $\text{NH}_3/\text{N}_2$  at 100 °C, sample temperature was ramped to 600 °C at a rate of 10 °C/min. The obtained  $\text{NH}_3$ -TPD curves are shown in Fig. S4. The desorption of  $\text{NH}_3$  can be divided into three stages, originating from weak (<180 °C), moderate (~200 °C) and strong (260-600 °C) acid sites, respectively. Weak and moderate acid sites are assigned to terminal hydroxyls, extraframework Al (EFAI) and Cu ions, while strong acid sites are Si-O(H)-Al bridging hydroxyls. Dealumination already takes place over the parent Cu-SSZ-13 during the 650 °C degreening treatment, so the catalyst does not exhibit a large amount of strong acid sites compared to “fresh” catalysts in previous reports.<sup>1,2</sup> The acid strength and density of  $\text{TiO}_2$  are much lower than those of SSZ-13, so Ti modification does not lead to significant change in catalyst acidity, except somewhat decreased amount of total acid sites due to surface coverage by  $\text{TiO}_2$ .<sup>3</sup> 800 °C hydrothermal aging further decreases the amount of strong acid sites and increases those of weak and moderate acid sites due to dealumination.<sup>1,4</sup> Ti modification does not change the profile of acidity evolution of Cu-SSZ-13 upon aging.

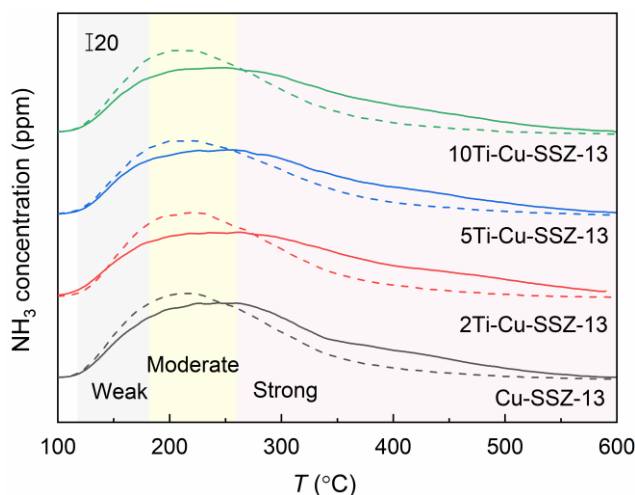

Fig. S4.  $\text{NH}_3$ -TPD curves of the catalysts. Solid line: fresh; dash line: aged.

Reference  $\text{TiO}_2$  material (Alladin, China) was anatase powders with an average diameter of 60 nm. The  $\text{TiO}_2$  powders were impregnated with  $\text{CuAc}_2$  (Sinopharm, China) and calcined at  $600\text{ }^\circ\text{C}$  for 2 h to obtain a sample denoted as  $\text{CuO}/\text{TiO}_2\text{-IM}$ . The copper loading was set at 2 wt.%. Fig. S5 shows the UV-vis spectra of these reference samples and  $\text{Cu-SSZ-13}$ . The adsorption edge of anatase slightly red-shifted after Cu impregnation, and pre-edge feature attributed to Cu-O-Ti charge transfer can be clearly identified over  $\text{CuO}/\text{TiO}_2\text{-IM}$ .<sup>5</sup> Bulk CuO contributes to elevated background intensity between 400 and 600 nm. Feature of Cu(II) d-d transfer at  $\sim 800\text{ nm}$  also exists on this sample.

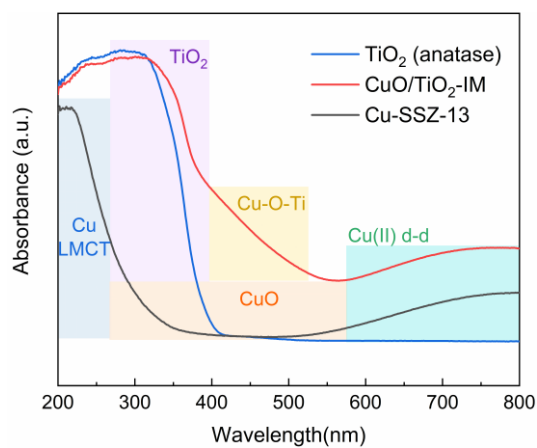

Fig. S5. UV-Vis spectra of the reference samples.

CuO/TiO<sub>2</sub>-IM and pure anatase TiO<sub>2</sub> were characterized by H<sub>2</sub>-TPR (Fig. S6). TiO<sub>2</sub> exhibits a broad reduction peak at 525 °C and continuous H<sub>2</sub> consumption at temperatures higher than 800 °C, attributed to the reduction of Ti<sup>4+</sup> (or in other words, lattice O) on surface and in bulk, respectively.<sup>6</sup> Three main H<sub>2</sub> consumption peaks can be identified over CuO/TiO<sub>2</sub>-IM. The ones at 125 and 200 °C are assigned to the reduction of CuO clusters on TiO<sub>2</sub> with different dispersions (*i.e.*, Cu/TiO<sub>2</sub> in the main text).<sup>7,8</sup> The one at 350 °C is attributed to the reduction of surface Ti<sup>4+</sup> of TiO<sub>2</sub> activated by Cu.<sup>8,9</sup> The H spillover effect from Cu to TiO<sub>2</sub> shifts the reduction process towards lower temperatures by ~ 175 °C.

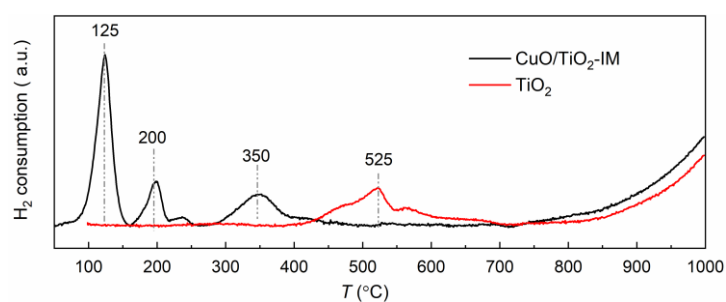

Fig. S6. H<sub>2</sub>-TPR of TiO<sub>2</sub> and Cu/TiO<sub>2</sub>-IM.



The SCR and NH<sub>3</sub> oxidation activities of CuO/TiO<sub>2</sub>-IM are shown in Fig. S7. It has inferior low-temperature SCR and NH<sub>3</sub> oxidation activities compared with Cu-SSZ-13 (Fig. 3). At temperatures above 350 °C, a negative NO<sub>x</sub> conversion of SCR is obtained according to Eq. 1 because the outlet NO<sub>x</sub> (*i.e.*, NO, NO<sub>2</sub> and N<sub>2</sub>O, mainly NO and NO<sub>2</sub>) concentration is higher than the inlet NO concentration (500 ppm). It means that inlet NH<sub>3</sub> is over-oxidized to NO<sub>x</sub> under the SCR condition. It is confirmed by NH<sub>3</sub> oxidation test that NH<sub>3</sub> is dominantly converted to NO<sub>x</sub> (mainly NO and NO<sub>2</sub>) at high temperatures.

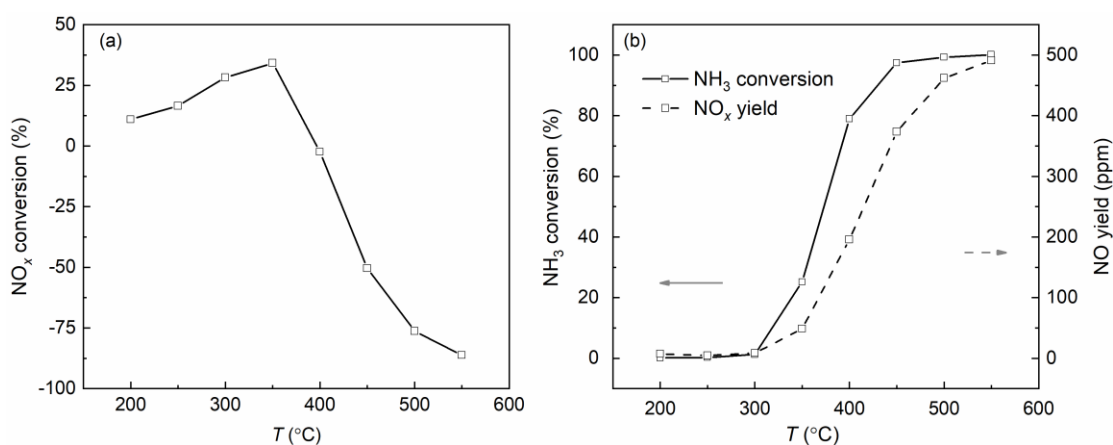

Fig. S7. (a) SCR and (b) NH<sub>3</sub> oxidation activities of CuO/TiO<sub>2</sub>-IM. NO yield during NH<sub>3</sub> oxidation is also shown in (b) as dashed lines (right axis). Reaction conditions: 500 ppm NO (w/o)/ 500 ppm NH<sub>3</sub>/5% O<sub>2</sub>/3%

$$\text{H}_2\text{O}/\text{N}_2, \text{GHSV} = 120,000 \text{ h}^{-1}.$$

The DTG curves of  $\text{TiO}_2$  with urea are shown in Fig. S8. In comparison with fresh  $\text{TiO}_2$ , 800 °C hydrothermally aged  $\text{TiO}_2$  exhibits higher onset temperature of urea decomposition and more obvious weight loss features attributed to the decomposition of biuret and CyA (>160 °C) due to phase transformation from anatase to rutile and sintering of  $\text{TiO}_2$ .

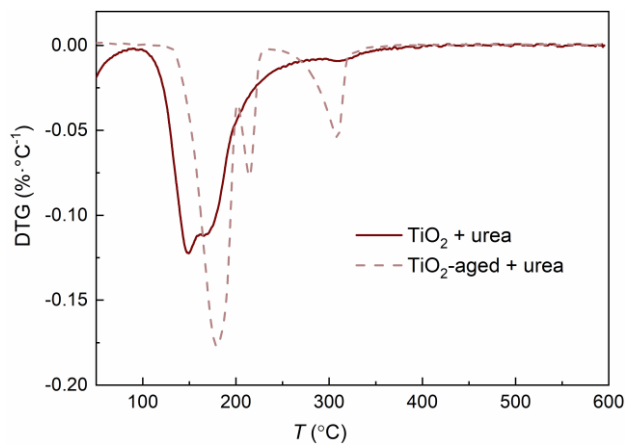

Fig. S8. DTG curves of  $\text{TiO}_2$  loaded with urea

Hydrothermal aging decreases the  $\text{NH}_3$  oxidation activity of Cu-SSZ-13-aged (Fig. S9), while 5Ti-Cu-SSZ-13-aged exhibits a similar activity to its fresh counterpart. All the aged catalysts show similar  $\text{NH}_3$  conversion. NO is the only detectable by-product from  $\text{NH}_3$  oxidation, and its yield increases after aging, except that 10Ti-Cu-SSZ-13-aged exhibits less NO formation than its fresh counterpart. Again, all the aged catalysts give similar NO yield. Over Ti-modified catalysts, it is deduced that Cu/TiO<sub>2</sub> species catalyzes the nonselective oxidation of  $\text{NH}_3$  to NO in fresh state (Figs. 3b and S7), and this species transforms to CuO- and CuAl<sub>2</sub>O<sub>4</sub>-like species upon hydrothermal aging (Fig. 7d). CuO-like species seems to be more active in nonselective oxidation of  $\text{NH}_3$  than Cu/TiO<sub>2</sub>, leading to degradation in high-temperature SCR over aged Ti-modified catalysts (Fig. 7a).

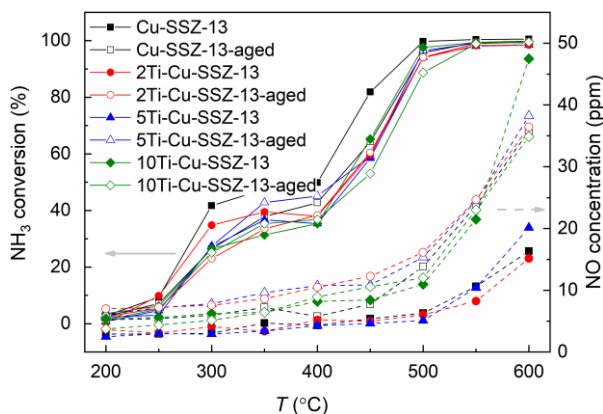

Fig. S9.  $\text{NH}_3$  oxidation activities of the catalysts. NO yield during  $\text{NH}_3$  oxidation is also shown as dashed lines (right axis). Reaction conditions: 500 ppm  $\text{NH}_3$ /5%  $\text{O}_2$ /3%  $\text{H}_2\text{O}/\text{N}_2$ , GHSV = 120,000  $\text{h}^{-1}$ .

The H<sub>2</sub>-TPR curves of all the four aged catalysts are shown in Fig. S10. As discussed in the main text, Cu/TiO<sub>2</sub> species in fresh 5Ti-Cu-SSZ-13 and 2Ti-Cu-SSZ-13 disappears after aging and CuO-like species forms. Due to the similarity in Cu species, 2Ti-Cu-SSZ-13-aged and 5Ti-Cu-SSZ-13-aged act similarly to Cu-SSZ-13-aged in activity tests (Figs. 7a and S9). 10Ti-Cu-SSZ-13-aged still contains Cu/TiO<sub>2</sub> but with a largely decreased amount compared with fresh 10Ti-Cu-SSZ-13, and has the lowest amount of CuO-like species among the aged catalysts. During aging, there probably exists a competition between Cu/TiO<sub>2</sub> and CuO-like species. CuO may have a higher affinity to Cu than TiO<sub>2</sub> does, so CuO-like species grows at the expense of Cu/TiO<sub>2</sub>, but the high TiO<sub>2</sub> loading of 10Ti-Cu-SSZ-13-aged may affect such a competition and inhibit the formation of CuO-like species. Besides, Cu/TiO<sub>2</sub> may also transform to inert CuAl<sub>2</sub>O<sub>4</sub>-like species due to the strong affinity of Al<sub>2</sub>O<sub>3</sub> to Cu suggested by DFT calculations.<sup>2</sup> Thus, the nonselective oxidation of NH<sub>3</sub> to NO is inhibited over 10Ti-Cu-SSZ-13-aged and the high-temperature SCR activity is somewhat improved compared with fresh 10Ti-Cu-SSZ-13.

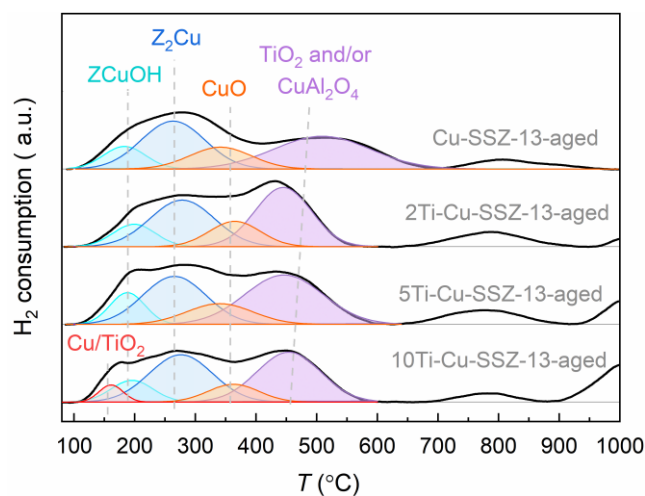

Fig. S10. H<sub>2</sub>-TPR of the aged catalysts.

## References:

1. Y. Ma, X. Wu, S. Cheng, L. Cao, L. Liu, Y. Xu, J. Liu, R. Ran, Z. Si and D. Weng, *Appl. Catal. A*, 2020, **602**, 117650.
2. Y. Ma, S. Cheng, X. Wu, T. Ma, L. Liu, B. Jin, M. Liu, J. Liu, R. Ran, Z. Si and D. Weng, *J. Catal.*, 2022, **405**, 199.
3. J. Liu, J. Liu, Z. Zhao, Y. Wei, W. Song, J. Li and X. Zhang, *Ind. Eng. Chem. Res.*, 2017, **56**, 5833.
4. D. Wang, Y. Jangjou, Y. Liu, M. K. Sharma, J. Luo, J. Li, K. Kamasamudram and W. S. Epling, *Appl. Catal. B*, 2015, **165**, 438.
5. O. V. Komova, A. V. Simakov, V. A. Rogov, D. I. Kochubei, G. V. Odegova, V. V. Kriventsov, E. A. Paukshtis, V. A. Ushakov, N. N. Sazonova and T. A. Nikoro, *J. Mol. Catal. A*, 2000, **161**, 191.
6. Y. Zeng, Y. Wang, S. Zhang and Q. Zhong, *Phys. Chem. Chem. Phys.*, 2018, **20**, 22744.
7. H. Li, S. Wu, L. Li, J. Wang, W. Ma and K. Shih, *Catal. Sci. Technol.*, 2015, **5**, 5129.
8. X. Wang, X. Chen, L. Ye, P. Lu, Y. Liu, J. You, W. Zeng, L. Lu, C. Hu and D. Chen, *Mol. Catal.*, 2020, **497**, 111225.
9. J. Xiaoyuan, D. Guanghui, L. Liping, C. Yingxu and Z. Xiaoming, *J. Mol. Catal. A*, 2004, **218**, 187.
